# Supplementary material for: Prediction of Eye Colour in Scandinavians Using the EyeColour 11 (EC11) SNP Set
Source: MDPI journal article supplement (doi:10.3390/genes12060821), 2021-05-27
Supplement: s1 [file s1]

Table S7: Eye colour prediction outcomes for 52,488 possible genotype combinations using the EC11 three-category model.

|                                    | <b>Blue</b> | <b>Brown</b> | <b>Intermediate</b> |
|------------------------------------|-------------|--------------|---------------------|
| Number of predictions <sup>1</sup> | 40,054      | 4,926        | 7,508               |
| Maximum probability value          | 0.999       | 1.00         | 0.941               |
| Minimum probability value          | 0.341       | 0.348        | 0.337               |

<sup>1</sup>Predictions of 52,488 possible genotype combinations in the EC11 SNP set using the three-category system. The predicted eye colour was the eye colour category with the highest probability (pmax). For comparison, only 226 genotype combinations were observed in the model data set
