# Supplementary material for: Prediction of Eye Colour in Scandinavians Using the EyeColour 11 (EC11) SNP Set
Source: MDPI journal article supplement (doi:10.3390/genes12060821), 2021-05-27
Supplement: s1 [file s1]

Table S3: Allele frequencies of 44 variants typed in the discovery data set comprising Danish, Swedish, and Italian individuals (DK/SWE/ITA) and 13 variants typed in the model data set comprising Norwegian individuals (NO).

| Gene           | Variant <sup>1</sup> | Reference<br>allele | Variant<br>allele | Variant allele frequency |                |                |                           |               |
|----------------|----------------------|---------------------|-------------------|--------------------------|----------------|----------------|---------------------------|---------------|
|                |                      |                     |                   | DK<br>(n=357)            | SWE<br>(n=182) | ITA<br>(n=218) | DK-SWE-<br>ITA<br>(n=757) | NO<br>(n=523) |
| <b>HERC2</b>   | <b>rs12913832*</b>   | <b>A</b>            | <b>G</b>          | <b>0.85</b>              | <b>0.84</b>    | <b>0.48</b>    | <b>0.74</b>               | <b>0.83</b>   |
| <i>IRF4</i>    | rs1050976            | C                   | T                 | 0.42                     | 0.45           | 0.46           | 0.44                      |               |
| <i>IRF4</i>    | rs10530949           | TCT                 | -                 | 0.45                     | 0.41           | 0.42           | 0.43                      |               |
| <i>IRF4</i>    | rs12211228           | G                   | C                 | 0.15                     | 0.13           | 0.14           | 0.14                      |               |
| <i>IRF4</i>    | rs9378807            | C                   | T                 | 0.47                     | 0.48           | 0.51           | 0.49                      |               |
| <i>TYR</i>     | rs11018509           | T                   | A                 | 0.27                     | 0.34           | 0.28           | 0.29                      |               |
| <b>TYR</b>     | <b>rs1126809</b>     | <b>G</b>            | <b>A</b>          | <b>0.23</b>              | <b>0.26</b>    | <b>0.25</b>    | <b>0.24</b>               | <b>0.24</b>   |
| <i>TYR</i>     | rs1393350*           | G                   | A                 | 0.22                     | 0.25           | 0.23           | 0.23                      | 0.23          |
| <i>TYR</i>     | rs2047512            | T                   | C                 | 0.38                     | 0.37           | 0.30           | 0.35                      |               |
| <i>TYR</i>     | rs34749698           | T                   | C                 | 0.22                     | 0.25           | 0.23           | 0.23                      |               |
| <b>TYR</b>     | <b>rs7120151</b>     | <b>A</b>            | <b>G</b>          | <b>0.75</b>              | <b>0.70</b>    | <b>0.76</b>    | <b>0.74</b>               | <b>NA</b>     |
| <i>TYR</i>     | rs9919559            | T                   | C                 | 0.31                     | 0.38           | 0.33           | 0.33                      |               |
| <b>SLC24A4</b> | <b>rs10131374</b>    | <b>G</b>            | <b>A</b>          | <b>0.15</b>              | <b>0.10</b>    | <b>0.16</b>    | <b>0.14</b>               | <b>0.15</b>   |
| <i>TYRP1</i>   | rs10491745           | T                   | C                 | 0.81                     | 0.83           | 0.82           | 0.82                      |               |
| <i>SLC24A4</i> | rs12590749           | C                   | A                 | 0.33                     | 0.34           | 0.46           | 0.37                      |               |
| <i>SLC24A4</i> | rs12880508           | C                   | T                 | 0.76                     | 0.75           | 0.70           | 0.74                      |               |
| <i>SLC24A4</i> | rs12894551           | T                   | C                 | 0.64                     | 0.63           | 0.69           | 0.65                      |               |

|                |                    |          |          |             |             |             |             |             |
|----------------|--------------------|----------|----------|-------------|-------------|-------------|-------------|-------------|
| <b>TYRP1</b>   | <b>rs1408799</b>   | <b>T</b> | <b>C</b> | <b>0.70</b> | <b>0.68</b> | <b>0.64</b> | <b>0.68</b> | <b>0.69</b> |
| SLC24A4        | rs17128288         | A        | G        | 0.32        | 0.29        | 0.27        | 0.30        |             |
| SLC24A4        | rs17128324         | C        | T        | 0.15        | 0.15        | 0.22        | 0.17        |             |
| TYRP1          | rs201447946        | T        | TA       | 0.06        | 0.06        | 0.06        | 0.06        |             |
| SLC24A4        | rs34755843         | CGACTCT  | -        | 0.17        | 0.16        | 0.15        | 0.16        |             |
| SLC24A4        | rs35617057         | G        | T        | 0.41        | 0.44        | 0.40        | 0.41        |             |
| SLC24A4        | rs4904887          | C        | G        | 0.33        | 0.33        | 0.42        | 0.36        |             |
| SLC24A4        | rs4904891          | G        | C        | 0.37        | 0.36        | 0.30        | 0.35        |             |
| SLC24A4        | rs4904897          | C        | T        | 0.24        | 0.22        | 0.20        | 0.22        |             |
| <b>SLC24A4</b> | <b>rs4904927</b>   | <b>A</b> | <b>G</b> | <b>0.90</b> | <b>0.89</b> | <b>0.81</b> | <b>0.87</b> | <b>0.89</b> |
| SLC24A4        | rs59977926         | T        | C        | 0.17        | 0.18        | 0.20        | 0.18        |             |
| TYRP1          | rs62538950         | A        | T        | 0.10        | 0.09        | 0.12        | 0.10        |             |
| TYRP1          | rs62538956         | T        | C        | 0.12        | 0.11        | 0.10        | 0.11        |             |
| SLC24A4        | rs7144273          | C        | T        | 0.50        | 0.50        | 0.46        | 0.49        |             |
| SLC24A4        | rs7152962          | G        | A        | 0.23        | 0.20        | 0.28        | 0.23        |             |
| SLC24A4        | rs7401792          | G        | A        | 0.64        | 0.66        | 0.56        | 0.62        |             |
| TYRP1          | rs74606098         | C        | T        | 0.06        | 0.07        | 0.06        | 0.06        |             |
| TYRP1          | rs79586719         | G        | A        | 0.07        | 0.07        | 0.06        | 0.06        |             |
| <b>OCA2</b>    | <b>rs1800407*</b>  | <b>C</b> | <b>T</b> | <b>0.04</b> | <b>0.05</b> | <b>0.11</b> | <b>0.07</b> | <b>0.03</b> |
| IRF4           | rs12203592*        | C        | T        | 0.07        | 0.06        | 0.13        | 0.08        | 0.09        |
| <b>SLC24A4</b> | <b>rs12896399*</b> | <b>G</b> | <b>T</b> | <b>0.56</b> | <b>0.51</b> | <b>0.36</b> | <b>0.49</b> | <b>0.52</b> |
| <b>SLC45A2</b> | <b>rs16891982*</b> | <b>C</b> | <b>G</b> | <b>0.96</b> | <b>0.95</b> | <b>0.87</b> | <b>0.93</b> | <b>0.95</b> |
| <b>OCA2</b>    | <b>rs1800401</b>   | <b>G</b> | <b>A</b> | <b>0.04</b> | <b>0.01</b> | <b>0.07</b> | <b>0.04</b> | <b>0.05</b> |
| OCA2           | rs1800414          | T        | C        | 0.00        | 0.01        | 0.00        | <0.01       |             |
| OCA2           | rs62008729         | C        | T        | 0.11        | 0.10        | 0.04        | 0.09        |             |

|             |                                |          |          |             |             |             |                 |             |
|-------------|--------------------------------|----------|----------|-------------|-------------|-------------|-----------------|-------------|
| <b>OCA2</b> | <b>rs121918166<sup>2</sup></b> | <b>C</b> | <b>T</b> | <b>0.01</b> | <b>0.01</b> | <b>0.00</b> | <b>&lt;0.01</b> | <b>0.01</b> |
| <b>OCA2</b> | <b>rs74653330<sup>2</sup></b>  | <b>C</b> | <b>T</b> | <b>0.00</b> | <b>0.01</b> | <b>0.00</b> | <b>&lt;0.01</b> | <b>0.02</b> |

---

<sup>1</sup>Variants in bold were part of the EC11 SNPs and typed in the model data set. rs7120151 was not included in the final prediction modelling

<sup>2</sup>The combined frequency of rs121918166 and rs74653330 was 0.01 in the discovery data set

\*Part of IrisPlex prediction model [3]

NA: Not analysed
