# Supplementary material for: Prediction of Eye Colour in Scandinavians Using the EyeColour 11 (EC11) SNP Set
Source: MDPI journal article supplement (doi:10.3390/genes12060821), 2021-05-27
Supplement: s1 [file s1]

S4 Table: Mean variable importance of top 20 variants.

| Rank | Gene           | Variant                  | Mean variable importance |
|------|----------------|--------------------------|--------------------------|
| 1    | <i>HERC2</i>   | rs12913832*              | 74.63%                   |
| 2    | <i>OCA2</i>    | rs121918166 + rs74653330 | 8.54%                    |
| 3    | <i>SLC45A2</i> | rs16891982*              | 6.23%                    |
| 4    | <i>OCA2</i>    | rs1800407*               | 5.26%                    |
| 5    | <i>TYRP1</i>   | rs1408799                | 1.54%                    |
| 6    | <i>SLC24A4</i> | rs4904927                | 1.19%                    |
| 7    | <i>SLC24A4</i> | rs12896399*              | 0.68%                    |
| 8    | <i>TYR</i>     | rs1126809                | 0.47%                    |
| 9    | <i>TYR</i>     | rs7120151 <sup>1</sup>   | 0.46%                    |
| 10   | <i>SLC22A4</i> | rs10131374               | 0.32%                    |
| 11   | <i>OCA2</i>    | rs1800401                | 0.32%                    |
| 12   | <i>SLC24A4</i> | rs17128324               | 0.11%                    |
| 13   | <i>TYRP1</i>   | rs10491745               | 0.066%                   |
| 14   | <i>TYRP1</i>   | rs62538956               | 0.055%                   |
| 15   | <i>TYRP1</i>   | rs74606098               | 0.048%                   |
| 16   | <i>TYR</i>     | rs2047512                | 0.044%                   |
| 17   | <i>TYR</i>     | rs11018509               | 0.015%                   |
| 18   | <i>TYR</i>     | rs1393350*               | 0.012%                   |
| 19   | <i>TYRP1</i>   | rs201447946              | 0.007%                   |
| 20   | <i>IRF4</i>    | rs1050976                | 0.006%                   |

<sup>1</sup>Variant not included in final EC11 SNP set

\*Part of IrisPlex prediction model [3]
