# Supplementary material for: Prediction of Eye Colour in Scandinavians Using the EyeColour 11 (EC11) SNP Set
Source: Genes (Basel). 2021 May 27;12(6):821. doi: 10.3390/genes12060821 (PMC8227851; doi:10.3390/genes12060821)
Supplement: Supplementary file 1 [file genes-12-00821-s001.zip]

Archive with 9 entries (7 files):
- genes-1238438-SI/
- genes-1238438-SI/Supp.material/
- genes-1238438-SI/Supp.material/S1table.xlsx
- genes-1238438-SI/Supp.material/S2table.xlsx
- genes-1238438-SI/Supp.material/S3table.pdf
- genes-1238438-SI/Supp.material/S4table.pdf
- genes-1238438-SI/Supp.material/S5table.xlsx
- genes-1238438-SI/Supp.material/S6table.xlsx
- genes-1238438-SI/Supp.material/S7table.pdf
