# Supplementary material for: Prediction of Eye Colour in Scandinavians Using the EyeColour 11 (EC11) SNP Set
Source: Genes (Basel). 2021 May 27;12(6):821. doi: 10.3390/genes12060821 (PMC8227851; doi:10.3390/genes12060821)
Supplement: Supplementary file 1 [file genes-12-00821-s001.zip › genes-1238438-SI/Supp.material/S1table.xlsx]

## Sheet: Ark1
Plex	SNP_ID	Forward Primer Sequence	Reverse Primer Sequence	Extended Primer Sequence
24-plex	rs12913832	ACGTTGGATGCGAGGCCAGTTTCATTTGAG	ACGTTGGATGAAAACAAAGAGAAGCCTCGG	cccccCCAGTTTCATTTGAGCATTAA
24-plex	rs10131374	ACGTTGGATGAATCTTGTGAGCCTGCTGAG	ACGTTGGATGGATTTCCTTACCGTTACGGG	GGAGAGAGTCCTGTTGG
24-plex	rs10491745	ACGTTGGATGGTGATTCTGTGATTTCCAAC	ACGTTGGATGCTTGATTTTCCTTGACCCAAC	ggGACCTTGACATTGTGAAC
24-plex	rs12590749	ACGTTGGATGGATTGCAGTCCTCAGATAAC	ACGTTGGATGATGAGGCTTACTTCTTCCAG	GTTCAGCTTTGCCCT
24-plex	rs12880508	ACGTTGGATGGTTTACCACAAAGCTGCAGT	ACGTTGGATGCTGGGGTGAATAAGCTTTAG	cccgAGCTGCAGTACCCCT
24-plex	rs12894551	ACGTTGGATGATTACAAGCATGAGCCACCG	ACGTTGGATGAAGGCCCTGCGTGCATTTTG	AGTGAGTGTACATTTTGTATAA
24-plex	rs1408799	ACGTTGGATGATCAAAACTGGTTCATCCAC	ACGTTGGATGCTTAGCACATTGTCTGGCTC	TCATCCACTTAATGAATGAATA
24-plex	rs17128288	ACGTTGGATGAATCCTGAGCCCAACTCTCC	ACGTTGGATGTTAGTGGAACGCAGAAGAGG	CCAGCTCTTCCCTGA
24-plex	rs17128324	ACGTTGGATGCCCGTAACGGTAAGGAAATC	ACGTTGGATGTCCCCAGTAGCTGTTTGTTG	CACATTGTTCTTACCAGGA
24-plex	rs201447946	ACGTTGGATGCTACCTGAATGCACTGATTTG	ACGTTGGATGATCAGTGCTGATGGCCTTAG	gatgAGCCAAAATATAGTGATTTTTTTT
24-plex	rs34755843	ACGTTGGATGTCTGTGGTTCTCCAAAGCTC	ACGTTGGATGGCCTGTGGGTCTTCATTAAC	ccccTCATTAACCAAAAAGAAGATCG
24-plex	rs35617057	ACGTTGGATGTTCCAGGACAACCTCAGAAG	ACGTTGGATGGCGTCCATAGAGCTAAAATC	CTAAAATCCGACACAGC
24-plex	rs4904887	ACGTTGGATGGGATGATGGATGCATGGAAG	ACGTTGGATGGGAAGGCTTTTAAAAGGGAG	acGGGAGAATGTCAAACATACATA
24-plex	rs4904891	ACGTTGGATGGAAACTCTTCCATTAGCTCC	ACGTTGGATGTACTGGAGTGAGGCTCATAC	gcttCCTTGCTATCCTAATGACC
24-plex	rs4904897	ACGTTGGATGTCCTTTCCTCAGTGGTTGTG	ACGTTGGATGCTCCAGCTTCTAGGATGTTC	TCTGTGAATTACAAGTTATGATTGTC
24-plex	rs4904927	ACGTTGGATGAAAGTTCACATGGTGGCAGG	ACGTTGGATGGTTGTTTCCTCTGAACCCTG	ccccaTGAGAAAGGCTGCCTTCTG
24-plex	rs59977926	ACGTTGGATGAGAGAGCGTTCACTCTAGCC	ACGTTGGATGGAGGTCAGACCTGTTTTTCC	cctACCTGTTTTTCCATACCA
24-plex	rs62538950	ACGTTGGATGGCATTAAGCAAACAATGTCC	ACGTTGGATGCCAGCTCTGTGATACCTGTG	agTTTCGAATAAAGAGATAGTGGC
24-plex	rs62538956	ACGTTGGATGAGGGACCTTCTGTAAATGGG	ACGTTGGATGTTCTGCAGCTGCGTTTGTGG	CTCTAATCTTTAGTGGGAAACC
24-plex	rs7144273	ACGTTGGATGCTGAAGCAGGCTTACGAATC	ACGTTGGATGCCTTCAAGCAAACTCACCTC	ggCCGTAGTCGGGTCCT
24-plex	rs7152962	ACGTTGGATGAGGTCTTGAGCTCAGAGAAG	ACGTTGGATGTTCTGCCCATGTGACCATTC	CCATTCCCTGGCTTTGA
24-plex	rs7401792	ACGTTGGATGGTGCAGCTTTTAGAGCATCC	ACGTTGGATGGACACTCTGCTGTGTAGTTG	TTGGCTGGGGCCTTG
24-plex	rs74606098	ACGTTGGATGCAAGGCACCAAAGAAATGAG	ACGTTGGATGAATGCTGGCCTCAAGATCAC	GATCACATGCTTATTTCATTC
24-plex	rs79586719	ACGTTGGATGTTTGGCCAGACGTTGAGATG	ACGTTGGATGGATCCTGGAATAAACCCAAAG	CTTAACTACTGAAAGGCTG
11-plex	rs1050976	ACGTTGGATGTCTGTAGACTGCCATCATTG	ACGTTGGATGTCCAGCAAGACCTAATCTAC	CTACAACAAATTAAAGAGC
11-plex	rs10530949	ACGTTGGATGGAAGCTGTCTTGGAAGTCTG	ACGTTGGATGTGAAATGGAGCATCCGCTTG	gagaCGCTTGGAGAATTAAGA
11-plex	rs12211228	ACGTTGGATGTGGAGCTGACTACGGAACTG	ACGTTGGATGATTGGCACGAGGAAGCATAG	ggTAAGCAGAAACAGCC
11-plex	rs9378807	ACGTTGGATGAGCCTGTGAACTTCCCTCTG	ACGTTGGATGTTGGGTTGGGGATGAGAACG	aCCCCACTCCCCCATG
11-plex	rs11018509	ACGTTGGATGTGTGTCTCCTATGCTGAATG	ACGTTGGATGCTTTTCAGGGTTGCTGTTCC	CCCAACTCCCCATGTCCC
11-plex	rs1126809	ACGTTGGATGCCTCTGCAGTATTTTTGAGC	ACGTTGGATGAATGGGTGCATTGGCTTCTG	GAGGACGGTGCCTT
11-plex	rs1393350	ACGTTGGATGACTCCTACTCTTCCTCAGTC	ACGTTGGATGAGTCACTGTTTGTATCTGGG	AAGACCACACAGATTT
11-plex	rs2047512	ACGTTGGATGAACTACACTGGATCCTGAAC	ACGTTGGATGGTTTCAATCTTATTTGAGGG	GTTGATGTATATTGTTTTTG
11-plex	rs34749698	ACGTTGGATGCATAACTGCCCAGGATTGTC	ACGTTGGATGAGGCAGAAATGAAGTCTGCT	gggttTCAGCTATGCTGAGGTTA
11-plex	rs7120151	ACGTTGGATGCCAGGACTTGCTTCCTTTAC	ACGTTGGATGATGGTCTGGTTGGAAGGATG	ACTTTTTAGCACACA
11-plex	rs9919559	ACGTTGGATGAAGTATTCTATCACACCAGG	ACGTTGGATGCCATAGTATCTAAGGCAATG	ccctcGTTGTTTATTCTTTACA
		ACGTTGGATGTCCAGCAAGACCTAATCTAC	CTACAACAAATTAAAGAGC
