# Supplementary material for: Prediction of Eye Colour in Scandinavians Using the EyeColour 11 (EC11) SNP Set
Source: Genes (Basel). 2021 May 27;12(6):821. doi: 10.3390/genes12060821 (PMC8227851; doi:10.3390/genes12060821)
Supplement: Supplementary file 1 [file genes-12-00821-s001.zip › genes-1238438-SI/Supp.material/S2table.xlsx]

## Sheet: Ark1
SNP_ID	SNP	PCR primer 1	PCR primer 2	SBE primer (incl. tail)	SBE primer length	SBE primer direction	SBE primer amount
rs10131374	[C/T]	GATTTCCTTACCGTTACGGG	AATCTTGTGAGCCTGCTGAG	ctctctctctctctctctctctctctctctctctctctctGGAGAGAGTCCTGTTGG	57	R	4x
rs1126809	[C/T]	AATGGGTGCATTGGCTTCTG	GCTCAAAAATACTGCAGAGG	ctctctctctctctctctAGAGGACGGTGCCTT	33	R	5x
rs121918166	[C/T]	TTATGGTCACAGGCGTGAAG	CATCATGCTCTGTCTCATCG	ctctctctctctctctctctctctctctctctcGGAGCATGGTGGTGA	48	F	4x
rs12896399	[G/T]	CTGGCGATCCAATTCTTTGT	GACCCTGTGTGAGACCCAGT	ctctctctctctctctctctctctctctctTCTTTAGGTCAGTATATTTTGGG	53	F	3x
rs12913832	[T/C]	TCAACATCAGGGTAAAAATC	GGCCCCTGATGATGATAGC	ctctctctctctctctctctctctGCGTGCAGAACTTGACA	41	R	1x
rs1408799	[A/G]	ATCAAAACTGGTTCATCCAC	CTTAGCACATTGTCTGGCTC	ctctctctctctctctctctctctctctctctctctctctctTCGGAGCACATGGTCA	58	R	2x
rs16891982	[C/G]	TCCAAGTTGTGCTAGAC	CGAAAGAGGAGTCGAGGTTG	ctctctctctcAAACACGGAGTTGATGCA	29	F	2x
rs1800401	[C/T]	AGGTCGTTGTTTCGTTCTGC	TGAGCCATCAAAAGAGGGAC	ctctctctctctctctctctctctctctcGGTGTCCATCAGCATC	45	R	1x
rs1800407	[C/T]	TGAAAGGCTGCCTCTGTTCT	CGATGAGACAGAGCATGATGA	ctctctcGCATACCGGCTCTCCC	23	F	0.5x
rs4904927	[A/G]	AAAGTTCACATGGTGGCAGG	GTTGTTTCCTCTGAACCCTG	ctctctctctctctctctctctTGAGAAAGGCTGCCTTCTG	41	F	1x
rs7120151	[A/G]	GTGTGCCTATCCCACCCTTA	CTGGTTGGAAGGATGCAAAT	ctctctctctctctctctctACTTTTTAGCACACA	35	F	-
rs74653330	[C/T]	CTCAGCTCTTGGTTGGAAAC	AAGTCCTGATTGCAGAAGTG	ctctctctctctctctctctctctctctctctctctctCCCCGATGGCAGTGG	53	F	1x
rs1393350	[C/T]	TTCCTCAGTCCCTTCTCTGC	GGGAAGGTGAATGATAACACG	ctctctctctctctctctctctctTTTGTAAAAGACCACACAGATTT	47	R	2x
rs12203592	[C/T]	ACAGGGCAGCTGATCTCTTC	GCTAAACCTGGCACCAAAAG	ctctctctctctctctTTTGGTGGGTAAAAGAAGG	35	F	2.5x
