# Supplementary material for: Prediction of Eye Colour in Scandinavians Using the EyeColour 11 (EC11) SNP Set
Source: Genes (Basel). 2021 May 27;12(6):821. doi: 10.3390/genes12060821 (PMC8227851; doi:10.3390/genes12060821)
Supplement: Supplementary file 1 [file genes-12-00821-s001.zip › genes-1238438-SI/Supp.material/S5table.xlsx]

## Sheet: Table S5
	rs12913832				IrisPlex Norway				EC11
pmax		Blue	Brown			Blue	Brown			Blue	Brown
	Blue	344	23		Blue	345	24		Blue	362	27
	Brown	32	124		Brown	31	123		Brown	14	120
	rs12913832				IrisPlex Norway				EC11
p>0.7		Blue	Brown			Blue	Brown			Blue	Brown
	Blue	344	23		Blue	337	19		Blue	352	22
	Brown	32	124		Brown	22	100		Brown	11	114
	Inconcl	0	0		Inconcl	17	28		Inconcl	13	11
