# Supplementary material for: Prediction of Eye Colour in Scandinavians Using the EyeColour 11 (EC11) SNP Set
Source: Genes (Basel). 2021 May 27;12(6):821. doi: 10.3390/genes12060821 (PMC8227851; doi:10.3390/genes12060821)
Supplement: Supplementary file 1 [file genes-12-00821-s001.zip › genes-1238438-SI/Supp.material/S6table.xlsx]

## Sheet: Table S6
	rs12913832					IrisPlex Norway					EC11					IrisPlex Web
pmax		Blue	Brown	Intermed.			Blue	Brown	Intermed.			Blue	Brown	Intermed.			Blue	Brown	Intermed.
	Blue	277	5	85		Blue	275	5	85		Blue	278	4	90		Blue	277	5	88
	Brown	16	102	38		Brown	15	92	26		Brown	3	94	15		Brown	16	102	35
	Intermed.	0	0	0		Intermed.	3	10	12		Intermed.	12	9	18		Intermed.	0	0	0
	rs12913832					IrisPlex Norway					EC11					IrisPlex Web
p>0.5		Blue	Brown	Intermed.			Blue	Brown	Intermed.			Blue	Brown	Intermed.			Blue	Brown	Intermed.
	Blue	277	5	85		Blue	275	4	85		Blue	277	4	87		Blue	277	4	85
	Brown	16	102	38		Brown	15	91	24		Brown	3	94	14		Brown	16	97	28
	Intermed.	0	0	0		Intermed.	3	9	7		Intermed.	10	9	16		Intermed.	0	0	0
	Inconcl.	0	0	0		Inconcl.	0	3	7		Inconcl.	3	0	6		Inconcl.	0	6	10
	rs12913832					IrisPlex Norway					EC11					IrisPlex Web
p>0.7		Blue	Brown	Intermed.			Blue	Brown	Intermed.			Blue	Brown	Intermed.			Blue	Brown	Intermed.
	Blue	277	5	85		Blue	192	1	35		Blue	204	1	47		Blue	277	4	80
	Brown	0	0	0		Brown	4	22	3		Brown	2	86	9		Brown	10	62	13
	Intermed.	0	0	0		Intermed.	0	0	0		Intermed.	5	0	3		Intermed.	0	0	0
	Inconcl.	16	102	38		Inconcl.	97	84	85		Inconcl.	82	20	64		Inconcl.	6	41	30
